# Supplementary material for: Is Prostate-Specific Antigen Effective for Population Screening of Prostate Cancer? A Systematic Review
Source: PubMed Central journal article supplement — Ann Lab Med. 2013 Jun 24;33(4):233–41. doi: 10.3343/alm.2013.33.4.233 (PMC3698300; doi:10.3343/alm.2013.33.4.233), 2013-06-24
Supplement: alm-33-233-s001.pdf [file alm-33-233-s001.pdf]

**Table S1.** Search strategy of existing systematic reviews

| Ovid MEDLINE(R) 1948 to January Week 2 2011 (Date : Jan. 25, 2011)                                                                                                                                                                                                                                                                                                                                                                                                                                                                                                                                                                                                                                                                                                                                                                                                                                                                                                                                                                                                                                                      |                                                                                                                                                                                                                                                                                                                                                                                       | Ovid MEDLINE(R) 1948 to January Week 2 2011 (Date : Jan. 25, 2011)                                                                                                                                                |                                                                                                                       |
|-------------------------------------------------------------------------------------------------------------------------------------------------------------------------------------------------------------------------------------------------------------------------------------------------------------------------------------------------------------------------------------------------------------------------------------------------------------------------------------------------------------------------------------------------------------------------------------------------------------------------------------------------------------------------------------------------------------------------------------------------------------------------------------------------------------------------------------------------------------------------------------------------------------------------------------------------------------------------------------------------------------------------------------------------------------------------------------------------------------------------|---------------------------------------------------------------------------------------------------------------------------------------------------------------------------------------------------------------------------------------------------------------------------------------------------------------------------------------------------------------------------------------|-------------------------------------------------------------------------------------------------------------------------------------------------------------------------------------------------------------------|-----------------------------------------------------------------------------------------------------------------------|
| Searched term                                                                                                                                                                                                                                                                                                                                                                                                                                                                                                                                                                                                                                                                                                                                                                                                                                                                                                                                                                                                                                                                                                           | Results                                                                                                                                                                                                                                                                                                                                                                               |                                                                                                                                                                                                                   |                                                                                                                       |
| 1 exp Prostate-Specific Antigen/<br>2 prostate specific antigen.mp.<br>3 psa.mp.<br>4 digital rectal examination.mp.<br>5 dre.mp.<br>6 transrectal ultrasound\$.mp.<br>7 TRUS.mp.<br>8 or/1-7<br>9 exp Mass Screening/<br>10 screening.mp<br>11 or/9-10<br>12 Prostatic Neoplasms/pc, di [Prevention & Control, Diagnosis]<br>13 prostat\$ cancer.mp<br>14 or/12-13<br>15 Meta-Analysis as Topic/<br>16 meta analy\$.tw.<br>17 Meta analy\$.tw.<br>18 Meta-Analysis/<br>19 (systematic adj [review\$1 or overview\$1]).tw.<br>20 exp Review Literature as Topic/<br>21 15 or 16 or 17 or 18 or 19 or 20<br>22 cochrane.ab.<br>23 embase.ab.<br>24 (psychlit or psyclit).ab.<br>25 (psychinfo or psycinfo).ab.<br>26 (cinahl or cinhal).ab.<br>27 science citation index.ab.<br>28 bids.ab.<br>29 cancerlit.ab.<br>30 22 or 23 or 24 or 25 or 26 or 27 or 28 or 29<br>31 reference list\$.ab.<br>32 bibliograph\$.ab.<br>33 hand-search\$.ab.<br>34 relevant journals.ab.<br>35 manual search\$.ab.<br>36 31 or 32 or 33 or 34 or 35<br>37 selection criteria.ab.<br>38 data extraction.ab.<br>39 37 or 38<br>40 Review/ | 14,957<br>19,289<br>16,504<br>2,484<br>1,574<br>2,326<br>1,288<br>27,265<br>82,691<br>274,229<br>280,110<br>13,197<br>51,189<br>55,595<br>10,658<br>30,312<br>949<br>26,037<br>23,430<br>5,185<br>64,035<br>14,493<br>12,062<br>783<br>3,860<br>4,735<br>1,161<br>283<br>465<br>22,700<br>5,502<br>8,393<br>2,432<br>418<br>1,382<br>16,256<br>12,887<br>5,999<br>17,884<br>1,549,697 | 41 39 and 40<br>42 Comment/<br>43 Letter/<br>44 Editorial/<br>45 animal/<br>46 human/<br>47 45 not (45 and 46)<br>48 42 or 43 or 44 or 47<br>49 21 or 30 or 36 or 41<br>50 49 not 48<br>51 8 and 11 and 14 and 50 | 1,217<br>421,911<br>690,790<br>264,367<br>4,583,636<br>11,324,471<br>3,397,015<br>4,383,404<br>82,971<br>76,887<br>48 |
|                                                                                                                                                                                                                                                                                                                                                                                                                                                                                                                                                                                                                                                                                                                                                                                                                                                                                                                                                                                                                                                                                                                         |                                                                                                                                                                                                                                                                                                                                                                                       | Ovid-EMBASE 1980 to 2011 Week 03 (Date : Jan. 25, 2011)                                                                                                                                                           |                                                                                                                       |
| Searched term                                                                                                                                                                                                                                                                                                                                                                                                                                                                                                                                                                                                                                                                                                                                                                                                                                                                                                                                                                                                                                                                                                           | Results                                                                                                                                                                                                                                                                                                                                                                               |                                                                                                                                                                                                                   |                                                                                                                       |
| 1 Exp Prostate-Specific Antigen/<br>2 prostate specific antigen.mp<br>3 psa.mp.<br>4 digital rectal examination.mp.<br>5 dre.mp.<br>6 transrectal ultrasound\$.mp.<br>7 TRUS.mp.<br>8 1 or 2 or 3 or 4 or 5 or 6 or 7<br>9 Mass Screening/<br>10 screening.mp<br>11 9 or 10<br>12 Prostate Tumor/pc, di [Prevention, Diagnosis]<br>13 prostat\$ cancer.mp<br>14 12 or 13<br>15 exp Meta Analysis/<br>16 ([meta adj analy\$] or metaanalys\$).tw.<br>17 (systematic adj [review\$1 or overview\$1]).tw.<br>18 15 or 16 or 17<br>19 cancerlit.ab.<br>20 cochrane.ab.<br>21 embase.ab.<br>22 (psychlit or psyclit).ab.<br>23 (psychinfo or psycinfo).ab.<br>24 (cinahl or cinhal).ab.<br>25 science citation index.ab.<br>26 bids.ab.<br>27 19 or 20 or 21 or 22 or 23 or 24 or 25 or 26<br>28 reference lists.ab.                                                                                                                                                                                                                                                                                                         | 26,457<br>28,760<br>22,880<br>4,470<br>1,965<br>3,084<br>1,986<br>40,974<br>40,572<br>457,305<br>457,305<br>5,103<br>86,323<br>88,604<br>52,449<br>41,997<br>30,756<br>90,693<br>593<br>19,935<br>16,447<br>907<br>3,933<br>6,021<br>1,506<br>355<br>29,317<br>6,562                                                                                                                  |                                                                                                                                                                                                                   |                                                                                                                       |

| Ovid-EMBASE 1980 to 2011 Week 03 (Date : Jan. 25, 2011) |                                   |
|---------------------------------------------------------|-----------------------------------|
| 29                                                      | bibliograph\$.ab. 10,885          |
| 30                                                      | hand-search\$.ab. 2,996           |
| 31                                                      | manual search\$.ab. 1,674         |
| 32                                                      | relevant journals.ab. 593         |
| 33                                                      | 28 or 29 or 30 or 31 or 32 20,486 |
| 34                                                      | data extraction.ab. 8,513         |
| 35                                                      | selection criteria.ab. 16,668     |
| 36                                                      | 34 or 35 23,892                   |
| 37                                                      | review.pt. 1,668,881              |
| 38                                                      | 36 and 37 15,445                  |
| 39                                                      | letter.pt. 714,786                |
| 40                                                      | editorial.pt. 363,331             |
| 41                                                      | animal/ 1,640,084                 |
| 42                                                      | human/ 12,116,994                 |
| 43                                                      | 41 not (41 and 42) 1,244,286      |
| 44                                                      | 39 or 40 or 43 2,310,117          |
| 45                                                      | 18 or 27 or 33 or 38 115,085      |
| 46                                                      | 45 not 44 110,095                 |
| 47                                                      | 8 and 11 and 14 and 46 87         |

| Cochrane Database of Systematic review (Date : Jan. 25, 2011) |                                                                                                                            |
|---------------------------------------------------------------|----------------------------------------------------------------------------------------------------------------------------|
| Searched term                                                 | Results                                                                                                                    |
| 1                                                             | (PROSTATE-SPECIFIC ANTIGEN) in Cochrane Reviews, Other reviews, Technology Assessments, Economic Evaluations 169           |
| 2                                                             | (prostate next specific next antigen) in Cochrane Reviews, Other reviews, Technology Assessments, Economic Evaluations 168 |
| 3                                                             | psa in Cochrane Reviews, Other reviews, Technology Assessments, Economic Evaluations 150                                   |
| 4                                                             | (digital next rectal next examination) in Cochrane Reviews, Other reviews, Technology Assessments, Economic Evaluations 41 |
| 5                                                             | dre in Cochrane Reviews, Other reviews, Technology Assessments, Economic Evaluations 25                                    |
| 6                                                             | (transrectal next ultrasound*) in Cochrane Reviews, Other reviews, Technology Assessments, Economic Evaluations 23         |

| Cochrane Database of Systematic review (Date : Jan. 25, 2011) |                                                                                                             |
|---------------------------------------------------------------|-------------------------------------------------------------------------------------------------------------|
| 7                                                             | trus in Cochrane Reviews, Other reviews, Technology Assessments, Economic Evaluations 22                    |
| 8                                                             | (#1 or #2 or #3 or #4 or #5 or #6 or #7) 228                                                                |
| 9                                                             | MASS SCREENING in Cochrane Reviews, Other reviews, Technology Assessments, Economic Evaluations 2,520       |
| 10                                                            | screening in Cochrane Reviews, Other reviews, Technology Assessments, Economic Evaluations 8,800            |
| 11                                                            | (#9 or #10) 8,800                                                                                           |
| 12                                                            | PROSTATIC NEOPLASMS in Cochrane Reviews, Other reviews, Technology Assessments, Economic Evaluations 481    |
| 13                                                            | (prostat* next cancer) in Cochrane Reviews, Other reviews, Technology Assessments, Economic Evaluations 474 |
| 14                                                            | (#12 or #13) in Cochrane Reviews, Other reviews, Technology Assessments, Economic Evaluations 595           |
| 15                                                            | (#8 and #11 and #14) 90                                                                                     |

| Centre of Reviews and Dissemination (Date : Jan. 25, 2011) |                                                   |
|------------------------------------------------------------|---------------------------------------------------|
| Searched Term                                              | Results                                           |
| 1                                                          | MeSH Prostate-Specific Antigen EXPLODE 1 2 3 4 90 |
| 2                                                          | PSA 126                                           |
| 3                                                          | prostate AND specific AND antigen 115             |
| 4                                                          | MeSH Digital Rectal Examination EXPLODE 1 2       |
| 5                                                          | digital AND rectal AND examination* 39            |
| 6                                                          | DRE 21                                            |
| 7                                                          | transrectal AND ultrasound\$ 23                   |
| 8                                                          | TRUS 15                                           |
| 9                                                          | #1 or #2 or #3 or #4 or #5 or #6 or #7 or #8 205  |
| 10                                                         | MeSH Mass Screening EXPLODE 1 2 3 4 5 6 7 2,318   |
| 11                                                         | screening 3,786                                   |
| 12                                                         | #10 or #11 4,224                                  |
| 13                                                         | MeSH Prostatic Neoplasms EXPLODE 1 2 3 4 459      |
| 14                                                         | prostat* AND cancer 499                           |
| 15                                                         | #13 or #14 594                                    |
| 16                                                         | #9 AND #12 AND #15 72                             |
