# Supplementary material for: Is Prostate-Specific Antigen Effective for Population Screening of Prostate Cancer? A Systematic Review
Source: PubMed Central journal article supplement — Ann Lab Med. 2013 Jun 24;33(4):233–41. doi: 10.3343/alm.2013.33.4.233 (PMC3698300; doi:10.3343/alm.2013.33.4.233), 2013-06-24
Supplement: alm-33-233-s002.pdf [file alm-33-233-s002.pdf]

**Table S2.** Search strategy of new Randomized controlled trials

| PubMed (Date : Apr. 22, 2011)                                                                                                                                                                                               |           | Ovid MEDLINE(R) 1948 to March Week 3 2011 (Date : Mar. 29, 2011)                            |         |
|-----------------------------------------------------------------------------------------------------------------------------------------------------------------------------------------------------------------------------|-----------|---------------------------------------------------------------------------------------------|---------|
| Searched Term                                                                                                                                                                                                               | Results   |                                                                                             |         |
| 1 "Prostate-Specific Antigen"[Mesh]                                                                                                                                                                                         | 15,340    | 19 or/14-18                                                                                 | 978,093 |
| 2 prostate specific antigen                                                                                                                                                                                                 | 21,960    | 20 8 and 11 and 14 and 19                                                                   | 3,227   |
| 3 psa                                                                                                                                                                                                                       | 18,037    | 21 limit 20 to yr= "2009 -Current"                                                          | 516     |
| 4 digital rectal examination                                                                                                                                                                                                | 2,990     | <b>Ovid EMBASE(R) 1980 to 2011 Week 12 (Date: Mar. 29, 2011)</b>                            |         |
| 5 dre                                                                                                                                                                                                                       | 1,609     | Searched Terms                                                                              | Results |
| 6 transrectal ultrasound*                                                                                                                                                                                                   | 2,530     | 1 exp Prostate-Specific Antigen/                                                            | 26,948  |
| 7 TRUS                                                                                                                                                                                                                      | 1,616     | 2 prostate specific antigen.mp.                                                             | 29,273  |
| 8 "Mass Screening"[Mesh]                                                                                                                                                                                                    | 84,559    | 3 psa.mp.                                                                                   | 23,295  |
| 9 screening                                                                                                                                                                                                                 | 4,257,056 | 4 digital rectal examination.mp.                                                            | 4,575   |
| 10 ("Prostatic Neoplasms/diagnosis"[Mesh] OR "Prostatic Neoplasms/prevention and control"[Mesh] )                                                                                                                           | 40,313    | 5 dre.mp.                                                                                   | 1,991   |
| 11 prostat* cancer                                                                                                                                                                                                          | 96,419    | 6 transrectal ultrasound\$.mp.                                                              | 3,123   |
| 12 #1 or #2 or #3 or #4 or #5 or #7                                                                                                                                                                                         | 31,052    | 7 TRUS.mp.                                                                                  | 2,020   |
| 13 #8 or #9                                                                                                                                                                                                                 | 4,257,056 | 8 or/1-7                                                                                    | 41,756  |
| 14 #10 or #11                                                                                                                                                                                                               | 96,419    | 9 exp Mass Screening/                                                                       | 117,338 |
| 15 (clinical[Title/Abstract] AND trial[Title/Abstract]) OR clinical trials[MeSH Terms] OR clinical trial[Publication Type] OR random*[Title/Abstract] OR random allocation[MeSH Terms] OR therapeutic use[MeSH Subheading]) | 3,603,333 | 10 screening.mp                                                                             | 465,327 |
| 16 #12 and #13 and #14 and #15                                                                                                                                                                                              | 5,012     | 11 or/9-10                                                                                  | 465,450 |
| 17 # 16 Limits: Publication Date from 2009                                                                                                                                                                                  | 867       | 12 Prostatic Neoplasms/pc, di [Prevention & Control, Diagnosis]                             | 5,136   |
| <b>Ovid MEDLINE(R) 1948 to March Week 3 2011 (Date : Mar. 29, 2011)</b>                                                                                                                                                     |           | 13 prostat\$ cancer.mp                                                                      | 88,085  |
| Searched Terms                                                                                                                                                                                                              | Results   | 14 or/12-13                                                                                 | 90,374  |
| 1 exp Prostate-Specific Antigen/                                                                                                                                                                                            | 15,341    | 15 clinical trial.pt.                                                                       | 0       |
| 2 prostate specific antigen.mp.                                                                                                                                                                                             | 19,791    | 16 random\$.mp.                                                                             | 727,255 |
| 3 psa.mp.                                                                                                                                                                                                                   | 16,978    | 17 ([single or double] adj [Blind\$ or mask\$]).mp.                                         | 167,692 |
| 4 digital rectal examination.mp.                                                                                                                                                                                            | 2,538     | 18 placebo\$.mp.                                                                            | 249,712 |
| 5 dre.mp.                                                                                                                                                                                                                   | 1,513     | 19 or/14-18                                                                                 | 961,283 |
| 6 transrectal ultrasound\$.mp.                                                                                                                                                                                              | 2,368     | 20 8 and 11 and 14 and 19                                                                   | 5,212   |
| 7 TRUS.mp.                                                                                                                                                                                                                  | 1,316     | 21 limit 20 to yr= "2009 -Current"                                                          | 1,300   |
| 8 or/1-7                                                                                                                                                                                                                    | 27,909    | <b>Cochrane Central Register of Controlled Trials and the NHS EED (Date: Mar. 29, 2011)</b> |         |
| 9 exp Mass Screening/                                                                                                                                                                                                       | 84,497    | Searched Terms                                                                              | Results |
| 10 screening.mp                                                                                                                                                                                                             | 281,201   | 1 (PROSTATE-SPECIFIC ANTIGEN)                                                               | 1,216   |
| 11 or/9-10                                                                                                                                                                                                                  | 287,223   | 2 (prostate next specific next antigen)                                                     | 1,214   |
| 12 Prostatic Neoplasms/pc, di [Prevention & Control, Diagnosis]                                                                                                                                                             | 13,488    | 3 (psa)                                                                                     | 986     |
| 13 prostat\$ cancer.mp                                                                                                                                                                                                      | 52,690    | 4 (digital next rectal next examination)                                                    | 211     |
| 14 or/12-13                                                                                                                                                                                                                 | 57,173    | 5 dre                                                                                       | 93      |
| 15 clinical trial.pt.                                                                                                                                                                                                       | 460,361   | 6 (transrectal next ultrasound*)                                                            | 226     |
| 16 random\$.mp.                                                                                                                                                                                                             | 659,842   | 7 trus                                                                                      | 133     |
| 17 ([single or double] adj [Blind\$ or mask\$]).mp.                                                                                                                                                                         | 147,589   | 8 (#1 OR #2 OR #3 OR #4 OR #5 OR #6 OR #7)                                                  | 1,630   |
| 18 placebo\$.mp.                                                                                                                                                                                                            | 139,855   | 9 MASS SCREENING                                                                            | 3,700   |
|                                                                                                                                                                                                                             |           | 10 screening                                                                                | 13,660  |
|                                                                                                                                                                                                                             |           | 11 (#9 OR #10)                                                                              | 13,660  |
|                                                                                                                                                                                                                             |           | 12 PROSTATIC NEOPLASMS                                                                      | 2,564   |

| Cochrane Central Register of Controlled Trials and the NHS EED<br>(Date: Mar. 29, 2011) |       |
|-----------------------------------------------------------------------------------------|-------|
| 13 (prostat* next cancer)                                                               | 2,742 |
| 14 (#12 OR #13)                                                                         | 3,360 |
| 15 (#8 AND #11 AND #14)                                                                 | 264   |
| 16 (#15), from 2009 to 2011                                                             | 26    |
